# Supplementary material for: High-performance dye-sensitized solar cells using Ag-doped CoS counter electrodes
Source: Royal Society of Chemistry journal article supplement (doi:10.1039/c8ra02765j), 2018-01-01
Supplement: c8ra02765j1.pdf [file c8ra02765j1.pdf]

## Supporting Information

### High-performance dye-sensitized solar cells using Ag-doped CoS counter electrodes

Guoce Zhuang, Huiling Liu, Xiaobo Chen

School of New Energy and Electronic Engineering, Yancheng Teachers University, Yancheng, 224051, PR China

**Table S1.** Comparison of the power conversion efficiency between the reported CoS based DSSCs and the present work.

| CEs                                          | $\eta$ (%) | Ref. <sup>a</sup> |
|----------------------------------------------|------------|-------------------|
| porous CoS                                   | 6.33%      | S1                |
| CoS acicular nanorod arrays                  | 7.67%      | S2                |
| CoS nanoparticles                            | 8.1%       | S3                |
| honeycomb-like CoS                           | 7.72%      | S4                |
| CoS-Graphene Composite                       | 6.31%      | S5                |
| CoS nanosheet arrays                         | 6.39%      | S6                |
| CoS/graphene composite                       | 7.08%      | S7                |
| Nickel doped cobalt sulfide                  | 5.50%      | S8                |
| mixed-phase cobalt sulfide                   | 7.2 %      | S9                |
| PANi-CoS                                     | 8.55%      | S10               |
| CoS nanosheets-coupled graphene quantum dots | 7.30%      | S11               |
| PAN/CoS nanocomposite                        | 7.41%      | S12               |
| 5% Ag-doped CoS                              | 8.35%      | This work         |

**<sup>a</sup>Reference:**

- S1. Lin, J. Y., Liao, J. H., & Chou, S. W. (2011). Cathodic electrodeposition of highly porous cobalt sulfide counter electrodes for dye-sensitized solar cells. *Electrochimica Acta*, 56(24), 8818-8826.
- S2. Kung, C. W., Chen, H. W., Lin, C. Y., Huang, K. C., Vittal, R., & Ho, K. C. (2012). CoS acicular nanorod arrays for the counter electrode of an efficient dye-sensitized solar cell. *ACS nano*, 6(8), 7016-7025.
- S3. Hsu, S. H., Li, C. T., Chien, H. T., Salunkhe, R. R., Suzuki, N., Yamauchi, Y., ... & Wu, K. C. W. (2014). Platinum-free counter electrode comprised of metal-organic-framework (MOF)-derived cobalt sulfide nanoparticles for efficient dye-sensitized solar cells (DSSCs). *Scientific reports*, 4, 6983.
- S4. Huo, J., Zheng, M., Tu, Y., Wu, J., Hu, L., & Dai, S. (2015). A high performance cobalt sulfide counter electrode for dye-sensitized solar cells. *Electrochimica Acta*, 159, 166-173.
- S5. Wang, F., Wu, C., Tan, Y., Jin, T., Chi, B., Pu, J., & Jian, L. (2015). CoS-Graphene composite counter electrode for high performance dye-sensitized solar cell. *Journal of nanoscience and*

nanotechnology, 15(2), 1180-1187.

- S6. Tai, S. Y., Chang, C. F., Liu, W. C., Liao, J. H., & Lin, J. Y. (2013). Optically transparent counter electrode for dye-sensitized solar cells based on cobalt sulfide nanosheet arrays. *Electrochimica Acta*, 107, 66-70..
- S7. Wang, G., Zhang, J., Kuang, S., Liu, S., & Zhuo, S. (2014). The production of cobalt sulfide/graphene composite for use as a low-cost counter-electrode material in dye-sensitized solar cells. *Journal of Power Sources*, 269, 473-478.
- S8. Kim, H. J., Kim, C. W., Punnoose, D., Gopi, C. V., Kim, S. K., Prabakar, K., & Rao, S. S. (2015). Nickel doped cobalt sulfide as a high performance counter electrode for dye-sensitized solar cells. *Applied Surface Science*, 328, 78-85.
- S9. Luo, Y., Shen, J., Cheng, R., Chen, X., Chen, Y., Sun, Z., & Huang, S. (2015). Facile synthesis of mixed-phase cobalt sulfide counter electrodes for efficient dye sensitized solar cells. *Journal of Materials Science: Materials in Electronics*, 26(1), 42-48.
- S10. Yang, P., Duan, J., & Tang, Q. (2015). Cobalt sulfide decorated polyaniline complex counter electrodes for efficient dye-sensitized solar cells. *Electrochimica Acta*, 184, 64-69.
- S11. Yu, C., Liu, Z., Chen, Y., Meng, X., Li, M., & Qiu, J. (2016). CoS nanosheets-coupled graphene quantum dots architectures as a binder-free counter electrode for high-performance DSSCs. *Science China Materials*, 59(2), 104-111.
- S12. Murugadoss, V., Arunachalam, S., Elayappan, V., & Angaiah, S. (2018). Development of electrospun PAN/CoS nanocomposite membrane electrolyte for high-performance DSSC. *Ionics*, 1-10.
